# Supplementary material
Source: publisher figshare collection journal article supplement (https://tandf.figshare.com/articles/dataset/_/7093463)
Supplement: Supplementary file 1 [file 2]

**Supplementary Figure S3.** Frequency of clinical features of BWS patients with mono-locus or multi-locus methylation defects.

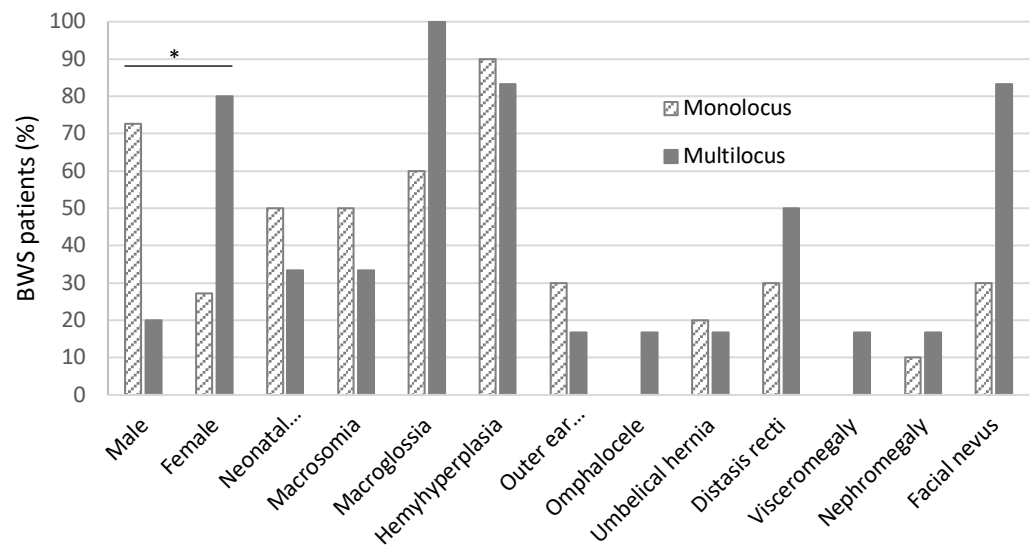

\*p = 0.03 according to Fisher’s exact test (both prenatal and postnatal BWS included for sex frequency determination).
